# Supplementary material for: Miscell: An efficient self-supervised learning approach for dissecting single-cell transcriptome
Source: PubMed Central journal article supplement — iScience. 2021 Oct 2;24(11):103200. doi: 10.1016/j.isci.2021.103200 (PMC8529514; doi:10.1016/j.isci.2021.103200), 2021-10-02
Supplement: mmc1.pdf [file mmc1.pdf]

## **Supplemental information**

### **Miscell: An efficient self-supervised learning approach for dissecting single-cell transcriptome**

**Hongru Shen, Yang Li, Mengyao Feng, Xilin Shen, Dan Wu, Chao Zhang, Yichen Yang, Meng Yang, Jiani Hu, Jilei Liu, Wei Wang, Qiang Zhang, Fangfang Song, Jilong Yang, Kexin Chen, and Xiangchun Li**

# SUPPLEMENTARY MATERIALS

## A: Miscell

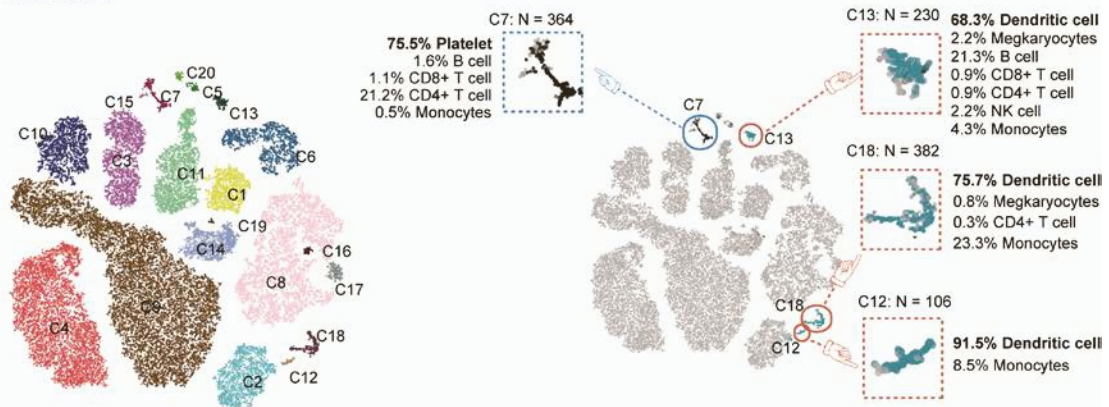

## B: Scanpy

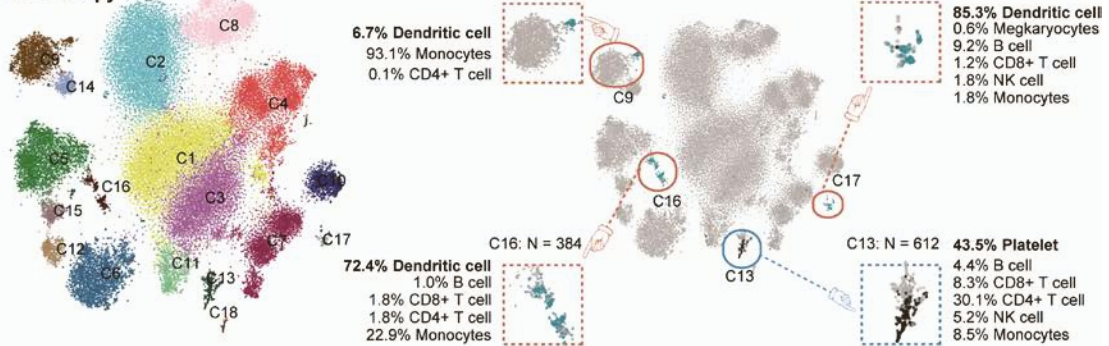

## C: scVI

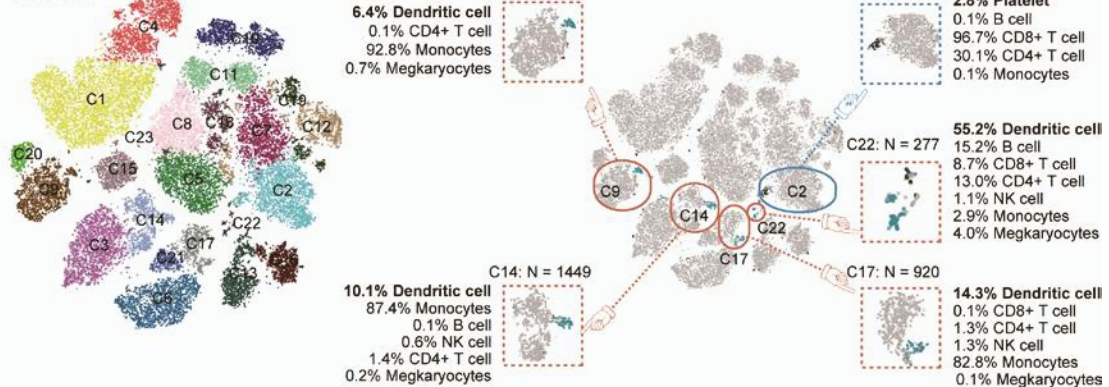

## D: Seurat

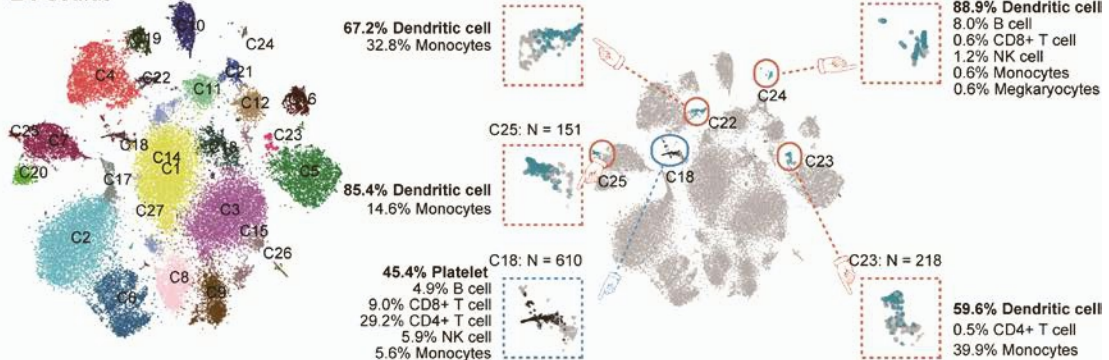

**Figure S1. Identification of cell types with small numbers such as platelet and dendritic cell by (A) Miscell, (B) Scanpy, (C) scVI and (D) Seurat, related to Figure 2. All cell clusters (left-side) detected by different methods and cell clusters with small numbers are highlighted (right-side).**

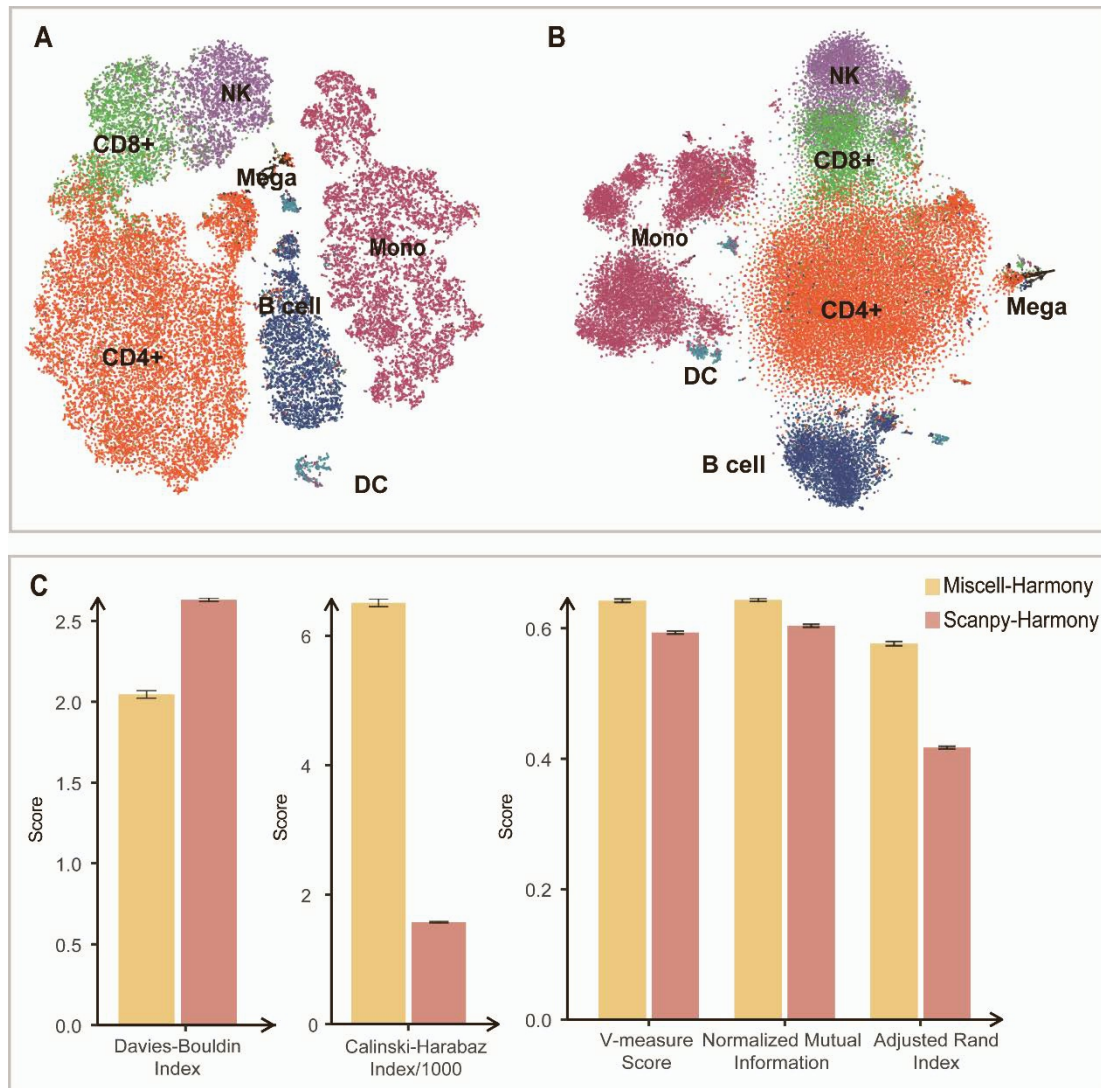

**Figure S2. The clustering performances of Miscell versus Scanpy on batch-corrected *PBMC* dataset, related to Figure 2. (A) The t-SNE visualization for Miscell; (B) The t-SNE visualization for Scanpy; (C) The clustering metrics of Miscell versus Scanpy.**

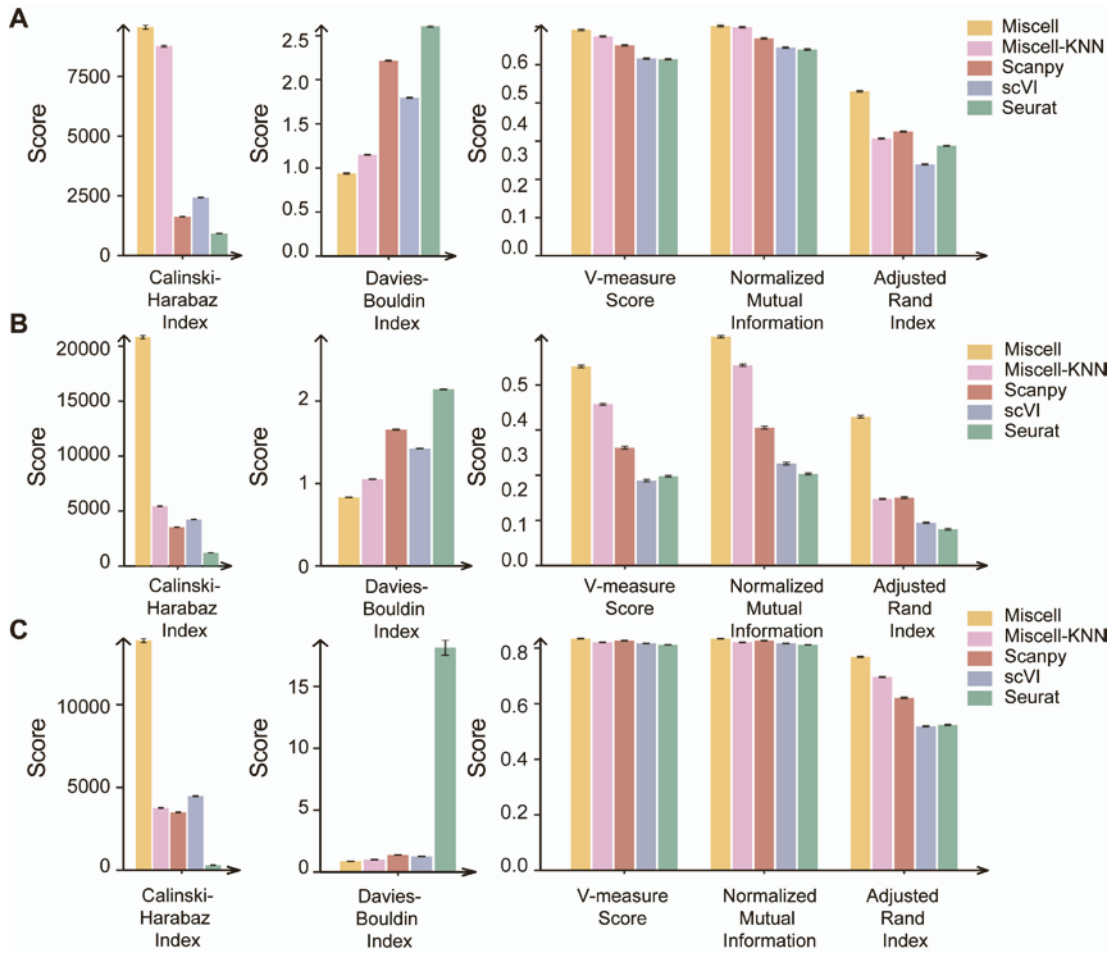

**Figure S3. Clustering performance of Miscell, Scanpy-KNN, Scanpy, scVI and Seurat in (A) the PBMC, (B) Smart-seq and (C) Muris dataset, related to Figure 2. Scanpy-KNN indicates replacement of principal component analysis results with latent features of Miscell.**

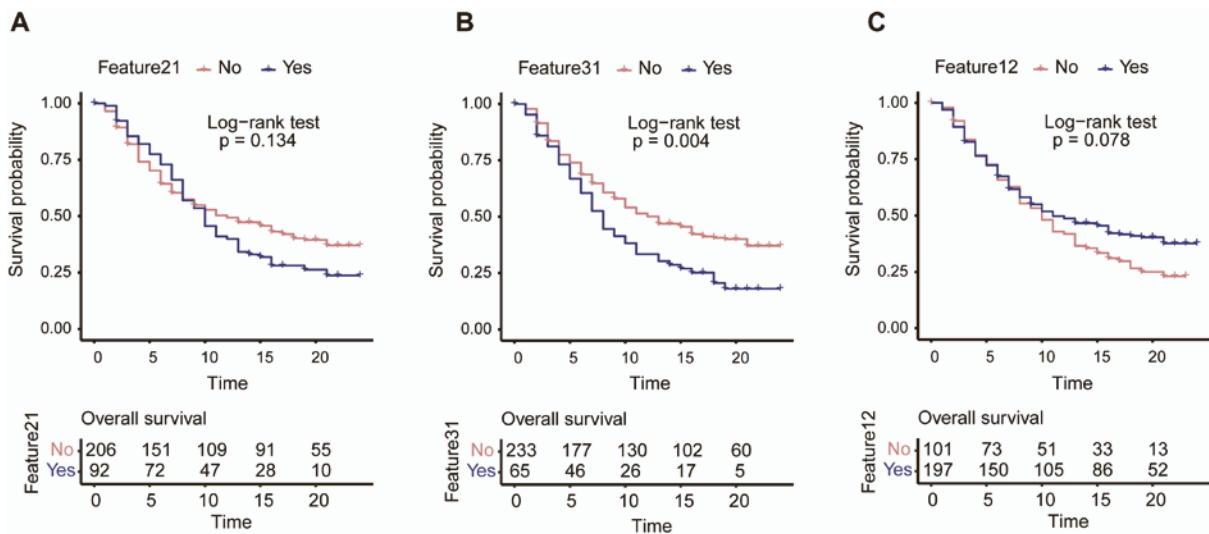

**Figure S4.** The association between ICB therapy response related latent features extracted by Miscell and overall survival in urothelial carcinoma clinical trials, related to **Figure 4.**

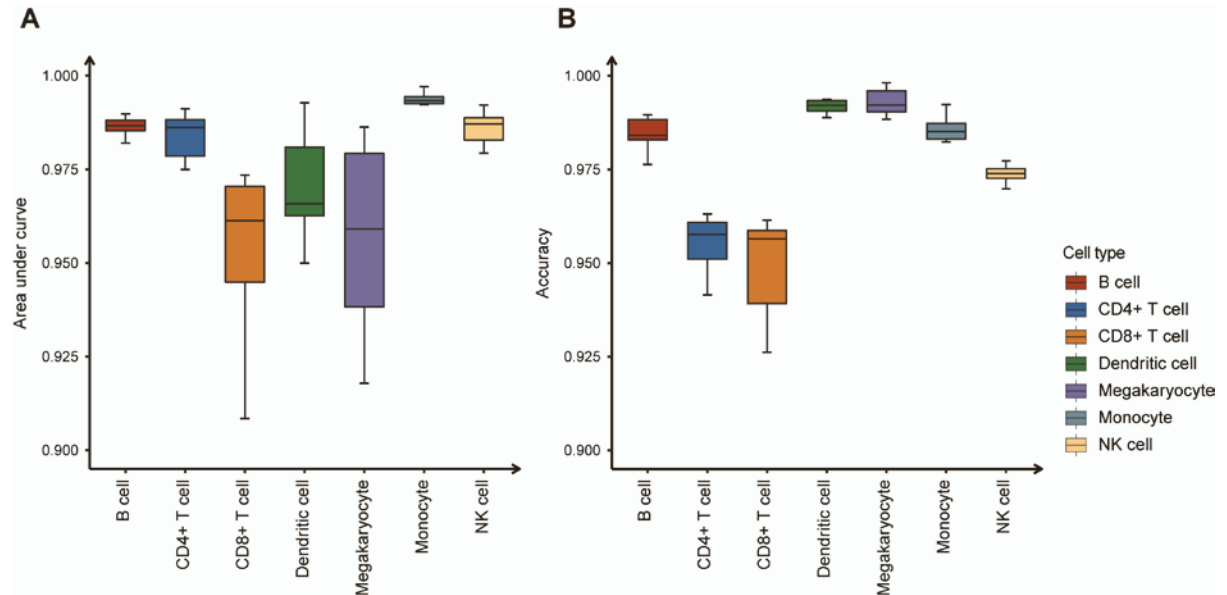

**Figure S5.** The performance of cell type identification in Miscell, related to **Figure 1.** (A) Area under the receiver operating curve and (B) accuracy from 10-fold cross-validation were shown.

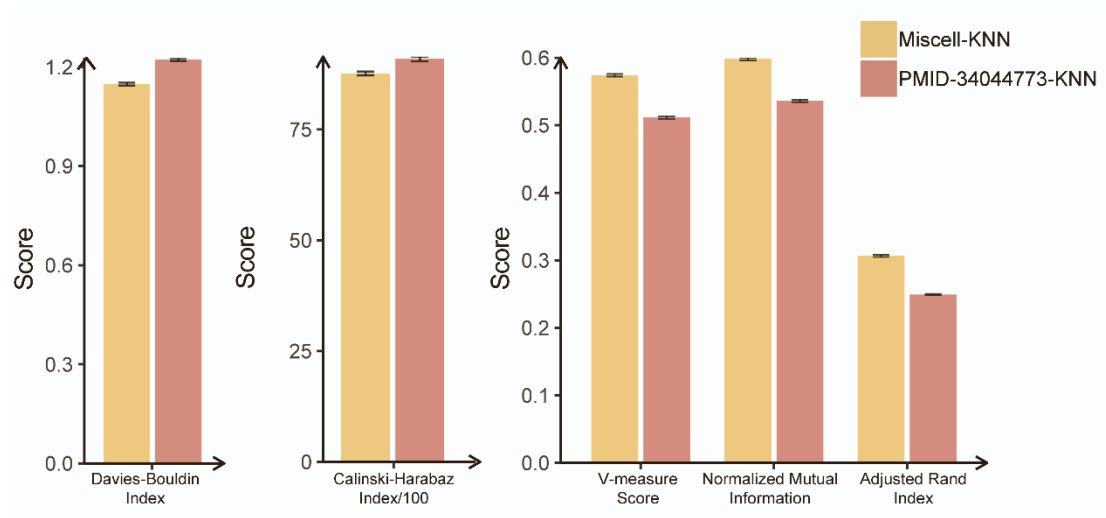

**Figure S6. The clustering performances of Miscell-KNN versus the tool proposed in PMID-34044773 on *PBMC* dataset with the same hyper-parameters in KNN clustering, related to Figure 2.**

**Table S1. Data source information of collected single cell, related to STAR Methods.**

| GEO accession | Samples | Tumor type  | Citation                                                                                                                                                                                             | Accession URL                                                                                                                                                                                                                                                                     |
|---------------|---------|-------------|------------------------------------------------------------------------------------------------------------------------------------------------------------------------------------------------------|-----------------------------------------------------------------------------------------------------------------------------------------------------------------------------------------------------------------------------------------------------------------------------------|
| GSE103322     | 5902    | HNSC        | Puram SV, Tirosh I, Parikh AS, Patel AP et al. Single-Cell Transcriptomic Analysis of Primary and Metastatic Tumor Ecosystems in Head and Neck Cancer. <i>Cell</i> 2017 Dec 14;171(7):1611-1624.e24. | <a href="https://www.ncbi.nlm.nih.gov/geo/download/?acc=GSE103322&amp;format=file&amp;file=GSE103322%5FHNSCC%5Fall%5Fdata%2Etxt%2Egz">https://www.ncbi.nlm.nih.gov/geo/download/?acc=GSE103322&amp;format=file&amp;file=GSE103322%5FHNSCC%5Fall%5Fdata%2Etxt%2Egz</a>             |
| GSE89567      | 6341    | Astrocytoma | Venteicher AS, Tirosh I, Hebert C, Yizhak K et al. Decoupling genetics, lineages, and microenvironment in IDH-mutant gliomas by single-cell RNA-seq. <i>Science</i> 2017 Mar 31;355(6332).           | <a href="https://www.ncbi.nlm.nih.gov/geo/download/?acc=GSE89567&amp;format=file&amp;file=GSE89567%5FIDH%5FA%5Fprocessed%5Fdata%2Etxt%2Egz">https://www.ncbi.nlm.nih.gov/geo/download/?acc=GSE89567&amp;format=file&amp;file=GSE89567%5FIDH%5FA%5Fprocessed%5Fdata%2Etxt%2Egz</a> |
| GSE108989     | 11138   | COAD        | Zhang L, Yu X, Zheng L, Zhang Y et al. Lineage tracking reveals dynamic relationships of T cells in colorectal cancer. <i>Nature</i> 2018 Dec;564(7735):268-272.                                     | <a href="https://www.ncbi.nlm.nih.gov/geo/query/acc.cgi?acc=GSE108989">https://www.ncbi.nlm.nih.gov/geo/query/acc.cgi?acc=GSE108989</a>                                                                                                                                           |
| GSE98638      | 5063    | LIHC        | Zheng C, Zheng L, Yoo JK, Guo H et al. Landscape of Infiltrating T Cells in Liver Cancer Revealed by Single-Cell Sequencing. <i>Cell</i> 2017 Jun 15;169(7):1342-1356.e16.                           | <a href="https://www.ncbi.nlm.nih.gov/geo/query/acc.cgi?acc=GSE98638">https://www.ncbi.nlm.nih.gov/geo/query/acc.cgi?acc=GSE98638</a>                                                                                                                                             |
| GSE102130     | 4058    | GBMLGG      | Filbin MG, Tirosh I, Hovestadt V, Shaw ML et al. Developmental and oncogenic programs in H3K27M gliomas dissected by single-cell RNA-seq. <i>Science</i> 2018 Apr 20;360(6386):331-335.              | <a href="https://www.ncbi.nlm.nih.gov/geo/download/?acc=GSE102130&amp;format=file&amp;file=GSE102130%5FK27Mprojec">https://www.ncbi.nlm.nih.gov/geo/download/?acc=GSE102130&amp;format=file&amp;file=GSE102130%5FK27Mprojec</a>                                                   |

|           |       |        |                                                                                                                                                                                          |  |                                                                                                                                                                                                                                                                                                             |
|-----------|-------|--------|------------------------------------------------------------------------------------------------------------------------------------------------------------------------------------------|--|-------------------------------------------------------------------------------------------------------------------------------------------------------------------------------------------------------------------------------------------------------------------------------------------------------------|
|           |       |        |                                                                                                                                                                                          |  | t%2ERSEM%2<br>Evh20170621%<br>2Etxt%2Egz                                                                                                                                                                                                                                                                    |
| GSE146771 | 10468 | COAD   | Zhang L, Li Z, Skrzypczynska KM, Fang Q et al. Single-Cell Analyses Inform Mechanisms of Myeloid-Targeted Therapies in Colon Cancer. <i>Cell</i> 2020 Apr 16;181(2):442-459.e29.         |  | <a href="https://www.ncbi.nlm.nih.gov/geo/query/acc.cgi?acc=GSE146771">https://www.ncbi.nlm.nih.gov/geo/query/acc.cgi?acc=GSE146771</a>                                                                                                                                                                     |
| GSE99254  | 12346 | LCA    | Guo X, Zhang Y, Zheng L, Zheng C et al. Global characterization of T cells in non-small-cell lung cancer by single-cell sequencing. <i>Nat Med</i> 2018 Jul;24(7):978-985.               |  | <a href="https://www.ncbi.nlm.nih.gov/geo/query/acc.cgi?acc=GSE99254">https://www.ncbi.nlm.nih.gov/geo/query/acc.cgi?acc=GSE99254</a>                                                                                                                                                                       |
| GSE72056  | 4645  | SKCM   | Tirosh I, Izar B, Prakadan SM, Wadsworth MH 2nd et al. Dissecting the multicellular ecosystem of metastatic melanoma by single-cell RNA-seq. <i>Science</i> 2016 Apr 8;352(6282):189-96. |  | <a href="https://www.ncbi.nlm.nih.gov/geo/download/?acc=GSE72056&amp;format=file&amp;file=GSE72056%5Fmelanoma%5Fsingle%5Fcell%5FRevised%5Fv2%2Etxt%2Egz">https://www.ncbi.nlm.nih.gov/geo/download/?acc=GSE72056&amp;format=file&amp;file=GSE72056%5Fmelanoma%5Fsingle%5Fcell%5FRevised%5Fv2%2Etxt%2Egz</a> |
| GSE115978 | 7186  | SKCM   | Jerby-Arnon L, Shah P, Cuoco MS, Rodman C et al. A Cancer Cell Program Promotes T Cell Exclusion and Resistance to Checkpoint Blockade. <i>Cell</i> 2018 Nov 1;175(4):984-997.e24.       |  | <a href="https://www.ncbi.nlm.nih.gov/geo/query/acc.cgi?acc=GSE115978">https://www.ncbi.nlm.nih.gov/geo/query/acc.cgi?acc=GSE115978</a>                                                                                                                                                                     |
| GSE70630  | 4347  | GBMLGG | Tirosh I, Venteicher AS, Hebert C, Escalante LE et al. Single-cell RNA-seq supports a developmental hierarchy in human oligodendrogloma. <i>Nature</i> 2016 Nov 10;539(7628):309-313.    |  | <a href="https://www.ncbi.nlm.nih.gov/geo/download/?acc=GSE70630&amp;format=file&amp;file=GSE70630%5FFOG%5Fprocessed%5Fdata%5Fv2%2Etxt%2Egz">https://www.ncbi.nlm.nih.gov/geo/download/?acc=GSE70630&amp;format=file&amp;file=GSE70630%5FFOG%5Fprocessed%5Fdata%5Fv2%2Etxt%2Egz</a>                         |

**Table S2. The clustering performance of Miscell with different parameter on the *Smart-seq* dataset, related to STAR Methods.**

| Queue size (q) | Momentum coefficient ( $\theta$ ) | Davies-Bouldin Index | Calinski-Harabaz Index | V_measure Score | Normalized Mutual Information | Adjusted Rand Index |
|----------------|-----------------------------------|----------------------|------------------------|-----------------|-------------------------------|---------------------|
| 1024           | 0.99                              | 0.74                 | 30550.34               | 0.43            | 0.43                          | 0.28                |
| 1024           | 0.999                             | 0.83                 | 20843.48               | 0.44            | 0.51                          | 0.33                |
| 1024           | 0.9999                            | 1.04                 | 11990.71               | 0.40            | 0.40                          | 0.55                |
| 2048           | 0.999                             | 0.78                 | 27186.49               | 0.42            | 0.42                          | 0.25                |
| 4096           | 0.999                             | 0.78                 | 27186.49               | 0.42            | 0.42                          | 0.25                |

**Table S3. Clustering metrics of different methods on the *PBMC* dataset, related to Figure**

**2.**

| Assessment                    | Method      | Mean     | Standard deviation | 95% confidence interval |
|-------------------------------|-------------|----------|--------------------|-------------------------|
| Adjusted Rand Index           | Miscell     | 0.431    | 0.002              | (0.43,0.431)            |
|                               | Miscell-KNN | 0.307    | 0.002              | (0.306,0.307)           |
|                               | Scanpy      | 0.325    | 0.001              | (0.325,0.325)           |
|                               | scVI        | 0.239    | 0.001              | (0.239,0.239)           |
|                               | Seurat      | 0.288    | 0.001              | (0.288,0.288)           |
| Normalized Mutual Information | Miscell     | 0.601    | 0.002              | (0.601,0.602)           |
|                               | Miscell-KNN | 0.598    | 0.002              | (0.598,0.598)           |
|                               | Scanpy      | 0.569    | 0.002              | (0.569,0.569)           |
|                               | scVI        | 0.545    | 0.002              | (0.545,0.545)           |
|                               | Seurat      | 0.540    | 0.002              | (0.54,0.54)             |
| V-measure Score               | Miscell     | 0.591    | 0.002              | (0.591,0.591)           |
|                               | Miscell-KNN | 0.574    | 0.002              | (0.574,0.574)           |
|                               | Scanpy      | 0.551    | 0.002              | (0.55,0.551)            |
|                               | scVI        | 0.516    | 0.002              | (0.516,0.516)           |
|                               | Seurat      | 0.514    | 0.002              | (0.514,0.514)           |
| Calinski-Harabaz Index        | Miscell     | 9564.303 | 87.846             | (9558.852,9569.755)     |
|                               | Miscell-KNN | 8762.874 | 40.394             | (8760.367,8765.381)     |
|                               | Scanpy      | 1627.366 | 9.561              | (1626.773,1627.959)     |
|                               | scVI        | 2430.310 | 13.418             | (2429.477,2431.142)     |
|                               | Seurat      | 927.235  | 5.023              | (926.923,927.547)       |
| Davies-Bouldin Index          | Miscell     | 0.936    | 0.007              | (0.936,0.937)           |
|                               | Miscell-KNN | 1.148    | 0.004              | (1.148,1.149)           |
|                               | Scanpy      | 2.217    | 0.007              | (2.216,2.217)           |
|                               | scVI        | 1.797    | 0.007              | (1.796,1.797)           |
|                               | Seurat      | 2.607    | 0.009              | (2.607,2.608)           |

**Table S4. Clustering metrics of different methods on the *Smart-seq* dataset, related to**

**Figure 2.**

| Assessment index | Method  | Mean  | Standard deviation | 95% confidence interval |
|------------------|---------|-------|--------------------|-------------------------|
| Adjusted Rand    | Miscell | 0.330 | 0.003              | (0.33,0.33)             |



|                               |             |           |         |                     |
|-------------------------------|-------------|-----------|---------|---------------------|
| Index                         | Miscell-KNN | 0.147     | 0.001   | (0.147,0.148)       |
|                               | Scanpy      | 0.150     | 0.002   | (0.15,0.15)         |
|                               | scVI        | 0.094     | 0.001   | (0.094,0.095)       |
|                               | Seurat      | 0.080     | 0.002   | (0.08,0.08)         |
|                               | Miscell     | 0.508     | 0.003   | (0.508,0.508)       |
| Normalized Mutual Information | Miscell-KNN | 0.444     | 0.002   | (0.444,0.444)       |
|                               | Scanpy      | 0.306     | 0.003   | (0.305,0.306)       |
|                               | scVI        | 0.226     | 0.003   | (0.226,0.226)       |
|                               | Seurat      | 0.203     | 0.002   | (0.203,0.203)       |
|                               | Miscell     | 0.442     | 0.003   | (0.442,0.442)       |
| V-measure Score               | Miscell-KNN | 0.358     | 0.002   | (0.357,0.358)       |
|                               | Scanpy      | 0.261     | 0.003   | (0.261,0.261)       |
|                               | scVI        | 0.188     | 0.003   | (0.188,0.188)       |
|                               | Seurat      | 0.198     | 0.002   | (0.198,0.198)       |
|                               | Miscell     | 20843.479 | 148.891 | (20834.24,20852.71) |
| Calinski-Harabaz Index        | Miscell-KNN | 5487.240  | 24.157  | (5485.741,5488.74)  |
|                               | Scanpy      | 3591.719  | 18.161  | (3590.592,3592.846) |
|                               | scVI        | 4288.770  | 18.434  | (4287.626,4289.913) |
|                               | Seurat      | 1259.716  | 7.894   | (1259.226,1260.206) |
|                               | Miscell     | 0.825     | 0.003   | (0.825,0.825)       |
| Davies-Bouldin Index          | Miscell-KNN | 1.045     | 0.003   | (1.045,1.045)       |
|                               | Scanpy      | 1.645     | 0.006   | (1.644,1.645)       |
|                               | scVI        | 1.416     | 0.004   | (1.415,1.416)       |
|                               | Seurat      | 2.134     | 0.008   | (2.134,2.135)       |

**Table S5. Cell types in the Tabula Muris dataset, related to Figure 2.**

|           |                 |                       |                       |                       |
|-----------|-----------------|-----------------------|-----------------------|-----------------------|
| Cell type | Leukocyte       | Immature T cell       | Dendritic cell        | Early pro-B cell      |
|           | B cell          | Fibroblast            | Monocyte              | DN1 thymic pro-T cell |
|           |                 | Luminal epithelial    |                       |                       |
|           | T cell          | cell of mammary gland | Lung endothelial cell | Kidney cell           |
|           | Bladder         | Skeletal muscle       | Immature B cell       | Endothelial cell of   |
|           | Urothelial cell | satellite cell        |                       | hepatic sinusoid      |
|           |                 |                       |                       |                       |
|           |                 |                       |                       |                       |

|  |                                 |                                                       |                                                           |                                                    |
|--|---------------------------------|-------------------------------------------------------|-----------------------------------------------------------|----------------------------------------------------|
|  | Stromal cell                    | Endothelial cell                                      | Kidney capillary<br>Endothelial cell                      | Duct epithelial cell                               |
|  | Hematopoietic<br>Precursor cell | Late pro-B cell                                       | Kidney loop of Henle<br>Ascending limb<br>Epithelial cell | Ciliated columnar cell of<br>Tracheobronchial tree |
|  | Mesenchymal<br>cell             | Granulocytopoietic<br>cell                            | Cardiac muscle cell                                       | Mast cell                                          |
|  | Keratinocyte                    | Macrophage                                            | Kidney collecting<br>duct epithelial cell                 | Basophil                                           |
|  | Proerythroblast                 | Granulocyte                                           | Erythroblast                                              | Mesangial cell                                     |
|  | Bladder cell                    | Neuroendocrine<br>cell                                | Endocardial cell                                          | Mesenchymal stem cell                              |
|  | Basal cell of<br>epidermis      | Natural killer cell                                   | Type II pneumocyte                                        | Epithelial cell                                    |
|  | Blood cell                      | kidney proximal<br>straight tubule<br>epithelial cell | Promonocyte                                               | Langerhans cell                                    |
|  | Fraction A pre-<br>pro B cell   | Non-classical<br>monocyte                             | Classical monocyte                                        | Myeloid cell                                       |
|  | Hepatocyte                      | Basal cell                                            | Alveolar macrophage                                       |                                                    |

**Table S6. Clustering metrics of different methods on the *Muris* dataset, related to Figure 2.**

| Assessment index | Method | Mean | Standard deviation | 95% confidence interval |
|------------------|--------|------|--------------------|-------------------------|
|------------------|--------|------|--------------------|-------------------------|

|                               |             |           |         |                       |
|-------------------------------|-------------|-----------|---------|-----------------------|
|                               | Miscell     | 0.769     | 0.003   | (0.769,0.769)         |
| Adjusted Rand Index           | Miscell-KNN | 0.696     | 0.002   | (0.696,0.696)         |
|                               | Scanpy      | 0.621     | 0.003   | (0.621,0.621)         |
|                               | scVI        | 0.519     | 0.002   | (0.519,0.519)         |
|                               | Seurat      | 0.524     | 0.002   | (0.524,0.524)         |
|                               | Miscell     | 0.834     | 0.001   | (0.834,0.834)         |
| Normalized Mutual Information | Miscell-KNN | 0.821     | 0.001   | (0.821,0.821)         |
|                               | Scanpy      | 0.827     | 0.001   | (0.827,0.827)         |
|                               | scVI        | 0.817     | 0.001   | (0.817,0.817)         |
|                               | Seurat      | 0.812     | 0.001   | (0.812,0.812)         |
|                               | Miscell     | 0.834     | 0.001   | (0.834,0.834)         |
| V-measure Score               | Miscell-KNN | 0.821     | 0.001   | (0.821,0.821)         |
|                               | Scanpy      | 0.827     | 0.001   | (0.827,0.827)         |
|                               | scVI        | 0.817     | 0.001   | (0.817,0.817)         |
|                               | Seurat      | 0.812     | 0.001   | (0.812,0.812)         |
|                               | Miscell     | 13886.872 | 119.332 | (13879.467,13894.277) |
| Calinski-Harabaz Index        | Miscell-KNN | 3767.196  | 20.558  | (3765.92,3768.471)    |
|                               | Scanpy      | 3498.473  | 17.984  | (3497.357,3499.589)   |
|                               | scVI        | 4479.667  | 20.561  | (4478.391,4480.943)   |
|                               | Seurat      | 305.999   | 4.129   | (305.743,306.255)     |
|                               | Miscell     | 0.867     | 0.003   | (0.866,0.867)         |
| Davies-Bouldin Index          | Miscell-KNN | 1.011     | 0.003   | (1.01,1.011)          |
|                               | Scanpy      | 1.373     | 0.005   | (1.373,1.374)         |
|                               | scVI        | 1.260     | 0.004   | (1.26,1.261)          |
|                               | Seurat      | 18.136    | 0.615   | (18.097,18.174)       |

**Table S7. The association between the latent features learned by Miscell and prognosis after controlling for Age, Sex and TNM stage in the *Smart-seq* dataset, related to Figure 4.**

|           | coef   | exp(coef) | se(coef) | z      | Pr(> z ) | q.value |
|-----------|--------|-----------|----------|--------|----------|---------|
| Feature30 | -0.377 | 0.686     | 0.091    | -4.129 | 0.000    | 0.002   |
| Feature54 | 0.175  | 1.192     | 0.049    | 3.589  | 0.000    | 0.011   |
| Feature6  | 0.189  | 1.208     | 0.056    | 3.372  | 0.001    | 0.014   |
| Feature27 | -0.175 | 0.839     | 0.053    | -3.322 | 0.001    | 0.014   |
| Feature7  | -0.228 | 0.796     | 0.075    | -3.026 | 0.002    | 0.023   |
| Feature10 | -0.164 | 0.849     | 0.054    | -3.045 | 0.002    | 0.023   |

---

|           |        |       |       |        |       |       |
|-----------|--------|-------|-------|--------|-------|-------|
| Feature12 | 0.199  | 1.221 | 0.064 | 3.108  | 0.002 | 0.023 |
| Feature20 | -0.154 | 0.857 | 0.053 | -2.904 | 0.004 | 0.030 |
| Feature21 | -0.182 | 0.834 | 0.064 | -2.839 | 0.005 | 0.032 |
| Feature4  | -0.135 | 0.874 | 0.053 | -2.534 | 0.011 | 0.066 |
| Feature26 | -0.349 | 0.706 | 0.136 | -2.565 | 0.010 | 0.066 |
| Feature1  | -0.121 | 0.886 | 0.051 | -2.357 | 0.018 | 0.080 |
| Feature3  | 0.114  | 1.121 | 0.049 | 2.348  | 0.019 | 0.080 |
| Feature9  | -0.134 | 0.875 | 0.056 | -2.384 | 0.017 | 0.080 |
| Feature28 | -0.158 | 0.854 | 0.068 | -2.327 | 0.020 | 0.080 |
| Feature49 | -0.132 | 0.876 | 0.055 | -2.409 | 0.016 | 0.080 |
| Feature29 | 0.123  | 1.131 | 0.054 | 2.299  | 0.021 | 0.081 |
| Feature19 | 0.120  | 1.127 | 0.055 | 2.179  | 0.029 | 0.104 |
| Feature25 | 0.090  | 1.094 | 0.050 | 1.798  | 0.072 | 0.243 |
| Feature22 | 0.083  | 1.086 | 0.051 | 1.634  | 0.102 | 0.327 |
| Feature15 | 0.249  | 1.283 | 0.173 | 1.441  | 0.150 | 0.427 |
| Feature16 | 0.073  | 1.076 | 0.051 | 1.427  | 0.154 | 0.427 |
| Feature23 | 0.072  | 1.074 | 0.049 | 1.447  | 0.148 | 0.427 |
| Feature17 | 0.065  | 1.067 | 0.054 | 1.210  | 0.226 | 0.537 |
| Feature33 | 0.551  | 1.735 | 0.450 | 1.224  | 0.221 | 0.537 |
| Feature36 | 0.551  | 1.735 | 0.450 | 1.224  | 0.221 | 0.537 |
| Feature41 | 0.551  | 1.735 | 0.450 | 1.224  | 0.221 | 0.537 |
| Feature18 | 0.066  | 1.068 | 0.056 | 1.174  | 0.241 | 0.550 |
| Feature13 | -0.052 | 0.949 | 0.053 | -0.990 | 0.322 | 0.624 |
| Feature32 | 0.055  | 1.057 | 0.052 | 1.049  | 0.294 | 0.624 |
| Feature35 | 0.392  | 1.480 | 0.411 | 0.952  | 0.341 | 0.624 |
| Feature38 | 0.392  | 1.480 | 0.411 | 0.952  | 0.341 | 0.624 |
| Feature40 | 0.056  | 1.057 | 0.053 | 1.057  | 0.291 | 0.624 |
| Feature43 | 0.392  | 1.480 | 0.411 | 0.952  | 0.341 | 0.624 |
| Feature47 | 0.392  | 1.480 | 0.411 | 0.952  | 0.341 | 0.624 |
| Feature44 | 0.179  | 1.196 | 0.210 | 0.851  | 0.395 | 0.701 |
| Feature5  | 0.043  | 1.044 | 0.055 | 0.782  | 0.434 | 0.751 |
| Feature8  | -0.034 | 0.967 | 0.057 | -0.593 | 0.553 | 0.885 |
| Feature11 | -0.035 | 0.966 | 0.058 | -0.602 | 0.547 | 0.885 |
| Feature52 | -0.031 | 0.969 | 0.052 | -0.607 | 0.544 | 0.885 |
| Feature2  | 0.031  | 1.031 | 0.055 | 0.561  | 0.575 | 0.897 |
| Feature24 | 0.012  | 1.013 | 0.051 | 0.246  | 0.806 | 0.901 |
| Feature31 | 0.029  | 1.029 | 0.058 | 0.501  | 0.617 | 0.901 |
| Feature34 | 0.138  | 1.148 | 0.357 | 0.386  | 0.700 | 0.901 |
| Feature37 | 0.138  | 1.148 | 0.357 | 0.386  | 0.700 | 0.901 |
| Feature39 | 0.138  | 1.148 | 0.357 | 0.386  | 0.700 | 0.901 |
| Feature42 | 0.138  | 1.148 | 0.357 | 0.386  | 0.700 | 0.901 |

---

|           |        |       |       |        |       |       |
|-----------|--------|-------|-------|--------|-------|-------|
| Feature45 | -0.105 | 0.900 | 0.306 | -0.345 | 0.730 | 0.901 |
| Feature46 | 0.138  | 1.148 | 0.357 | 0.386  | 0.700 | 0.901 |
| Feature48 | 0.138  | 1.148 | 0.357 | 0.386  | 0.700 | 0.901 |
| Feature51 | -0.024 | 0.976 | 0.151 | -0.160 | 0.873 | 0.901 |
| Feature53 | -0.024 | 0.976 | 0.151 | -0.160 | 0.873 | 0.901 |
| Feature55 | -0.024 | 0.976 | 0.151 | -0.160 | 0.873 | 0.901 |
| Feature56 | -0.024 | 0.976 | 0.151 | -0.160 | 0.873 | 0.901 |
| Feature57 | -0.024 | 0.976 | 0.151 | -0.160 | 0.873 | 0.901 |
| Feature58 | -0.024 | 0.976 | 0.151 | -0.160 | 0.873 | 0.901 |
| Feature59 | -0.024 | 0.976 | 0.151 | -0.160 | 0.873 | 0.901 |
| Feature60 | -0.021 | 0.979 | 0.051 | -0.407 | 0.684 | 0.901 |
| Feature61 | -0.024 | 0.976 | 0.151 | -0.160 | 0.873 | 0.901 |
| Feature62 | -0.024 | 0.976 | 0.151 | -0.160 | 0.873 | 0.901 |
| Feature63 | -0.024 | 0.976 | 0.151 | -0.160 | 0.873 | 0.901 |
| Feature64 | -0.024 | 0.976 | 0.151 | -0.160 | 0.873 | 0.901 |
| Feature14 | 0.003  | 1.003 | 0.054 | 0.063  | 0.950 | 0.952 |
| Feature50 | 0.003  | 1.003 | 0.051 | 0.061  | 0.952 | 0.952 |

**Table S8. Top-15 marker genes of CD4+ T cell and CD8+ T cell clusters identified by three methods, related to Figure 3.**

| Miscell         | CD4+ T cell     |                 | Miscell      | CD8+ T cell   |                    |
|-----------------|-----------------|-----------------|--------------|---------------|--------------------|
|                 | Scanpy          | Seurat          |              | Scanpy        | Seurat             |
| <i>CD4</i>      | <i>CD4</i>      | <i>TNFRSF4</i>  | <i>CD8A</i>  | <i>CD8A</i>   | <i>KLRK1</i>       |
| <i>CD40LG</i>   | <i>LTB</i>      | <i>CD4</i>      | <i>KLRK1</i> | <i>KLRK</i>   | <i>CD8A</i>        |
| <i>FBLN7</i>    | <i>IL2RA</i>    | <i>IL2RA</i>    | <i>CD8B</i>  | <i>CD8B</i>   | <i>KLRC4-KLRK1</i> |
| <i>TNFRSF25</i> | <i>TNFRSF4</i>  | <i>CD40LG</i>   | <i>KLRD1</i> | <i>NKG7</i>   | <i>NKG7</i>        |
| <i>TBC1D4</i>   | <i>TNFRSF25</i> | <i>LTB</i>      | <i>KLRC4</i> | <i>CCL5</i>   | <i>CCL5</i>        |
| <i>SLAMF1</i>   | <i>PIM2</i>     | <i>FOXP3</i>    | <i>KLRC3</i> | <i>KLRD1</i>  | <i>CTSW</i>        |
| <i>TMEM173</i>  | <i>TBC1D4</i>   | <i>CD28</i>     | <i>KLRC2</i> | <i>CTSW</i>   | <i>CD8B</i>        |
| <i>KLRB1</i>    | <i>ICOS</i>     | <i>FBLN7</i>    | <i>KLRC1</i> | <i>GZMA</i>   | <i>GZMB</i>        |
| <i>ICOS</i>     | <i>CD40LG</i>   | <i>TNFRSF25</i> | <i>CTSW</i>  | <i>SLAMF7</i> | <i>GZMH</i>        |
| <i>CCR4</i>     | <i>GPR183</i>   | <i>CORO1B</i>   | <i>AOAH</i>  | <i>CCL4</i>   | <i>CCL4</i>        |
| <i>FOXP3</i>    | <i>CTLA4</i>    | <i>TBC1D4</i>   | <i>ABCB1</i> | <i>AOAH</i>   | <i>KLRD1</i>       |
| <i>ICA1</i>     | <i>FOXP3</i>    | <i>CTSB</i>     | <i>CCL5</i>  | <i>GZMH</i>   | <i>GZMA</i>        |
| <i>TBXAS1</i>   | <i>TMEM173</i>  | <i>PIM2</i>     | <i>XCL1</i>  | <i>PRF1</i>   | <i>KLRC2</i>       |

|                |               |              |              |              |              |
|----------------|---------------|--------------|--------------|--------------|--------------|
| <i>PIK3IP1</i> | <i>SELL</i>   | <i>IL6R</i>  | <i>CD160</i> | <i>KLRC4</i> | <i>TARP</i>  |
| <i>FAAH2</i>   | <i>SLAMF1</i> | <i>CTLA4</i> | <i>CD55</i>  | <i>CST7</i>  | <i>KLRC3</i> |

**Table S9. Features and capabilities for the methods, related to STAR Methods, related to STAR Methods.**

|                                | Miscell                  | Scanpy                   | scVI                  | Seurat                            |
|--------------------------------|--------------------------|--------------------------|-----------------------|-----------------------------------|
| Core procedure                 | Self-supervised learning | PCA                      | Deep generative model | PCA                               |
| Cluster delineation            | DBSCAN                   | KNN                      | KNN                   | SNN                               |
| Marker gene detection strategy | Integrated gradient      | t-test/<br>Wilcoxon test | -                     | MAST/<br>t-test/<br>Wilcoxon test |

**Data S1. The feature encoder used in the self-supervised learning framework is a DenseNet with 21 layers, related to STAR Methods.**



**Extended Data2. The association between the latent features learned by Miscell and prognosis in the *Smart-seq* dataset, related to Figure 4.**



Feature30 + C1 + C2

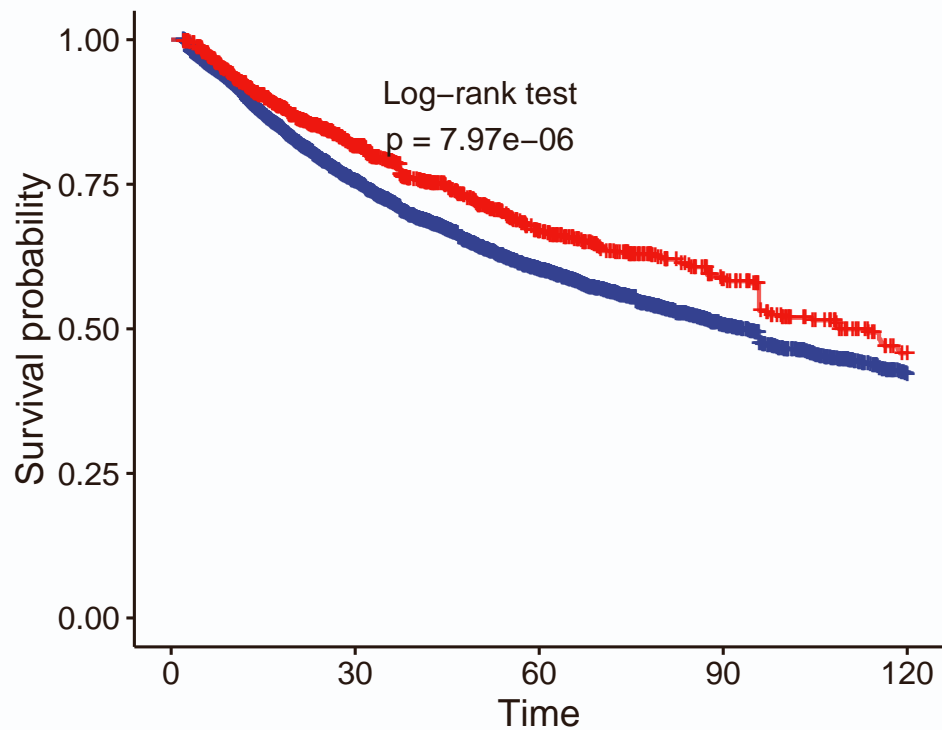

### Overall survival

| Feature30 | 0    | 30   | 60   | 90  | 120 |
|-----------|------|------|------|-----|-----|
| C1        | 8805 | 3886 | 1644 | 730 | 349 |
| C2        | 1464 | 725  | 315  | 164 | 73  |

Time

Feature54 + C1 + C2

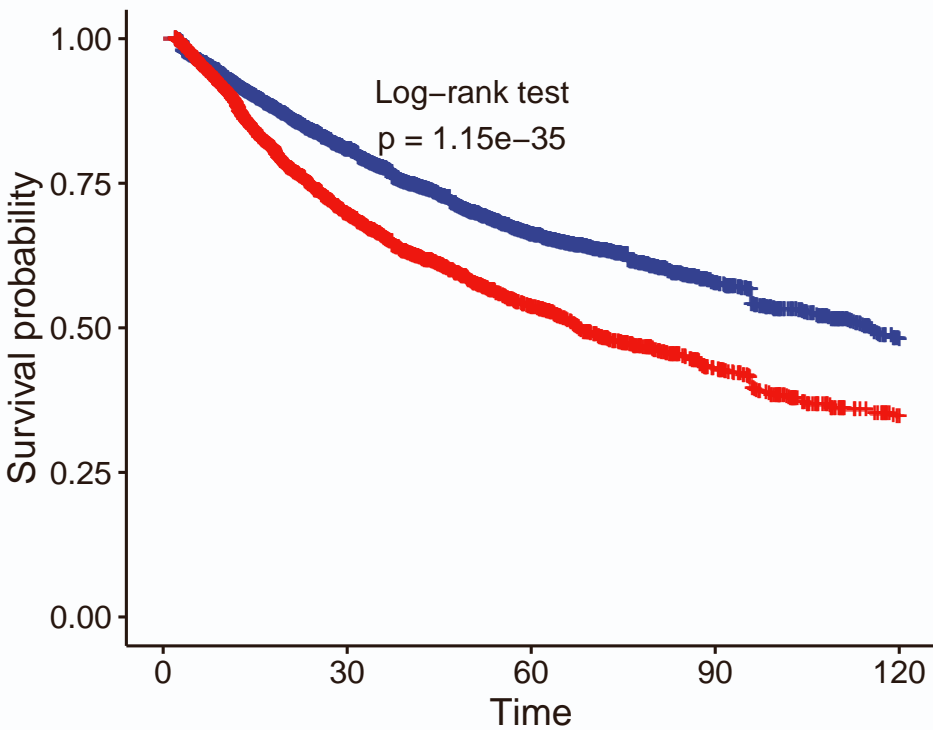

### Overall survival

| Feature54 | 0    | 30   | 60   | 90  | 120 |
|-----------|------|------|------|-----|-----|
| C1        | 6140 | 2970 | 1283 | 598 | 285 |
| C2        | 4129 | 1641 | 676  | 296 | 137 |

Time

Feature6 + C1 + C2

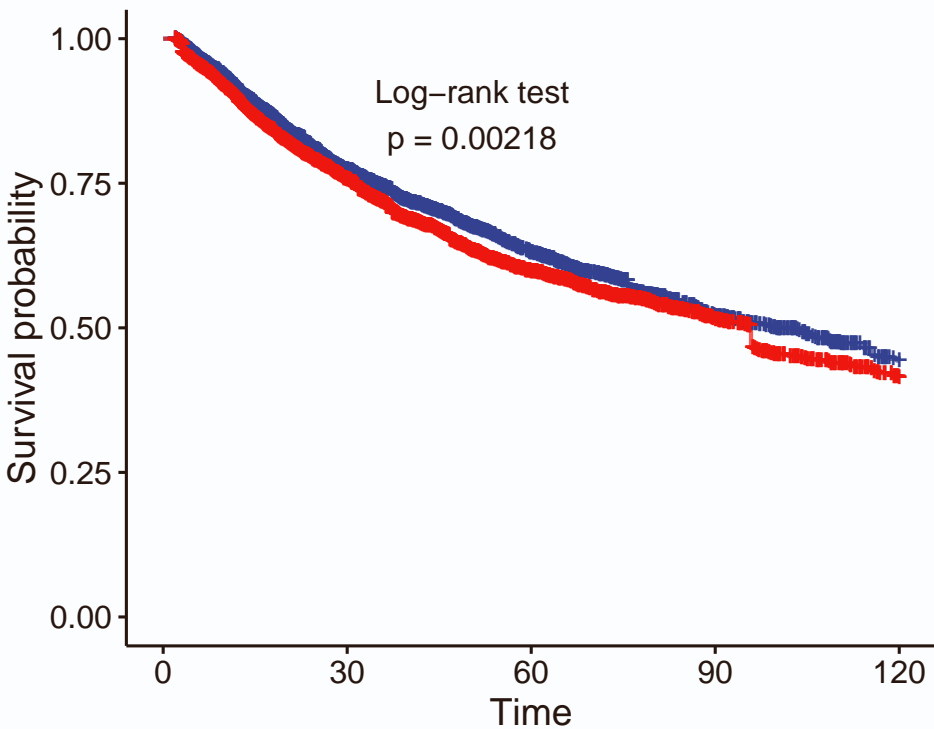

### Overall survival

| Feature6 | 0    | 30   | 60   | 90  | 120 |
|----------|------|------|------|-----|-----|
| C1       | 4298 | 1966 | 882  | 362 | 156 |
| C2       | 5971 | 2645 | 1077 | 532 | 266 |

Time

Feature27 + C1 + C2

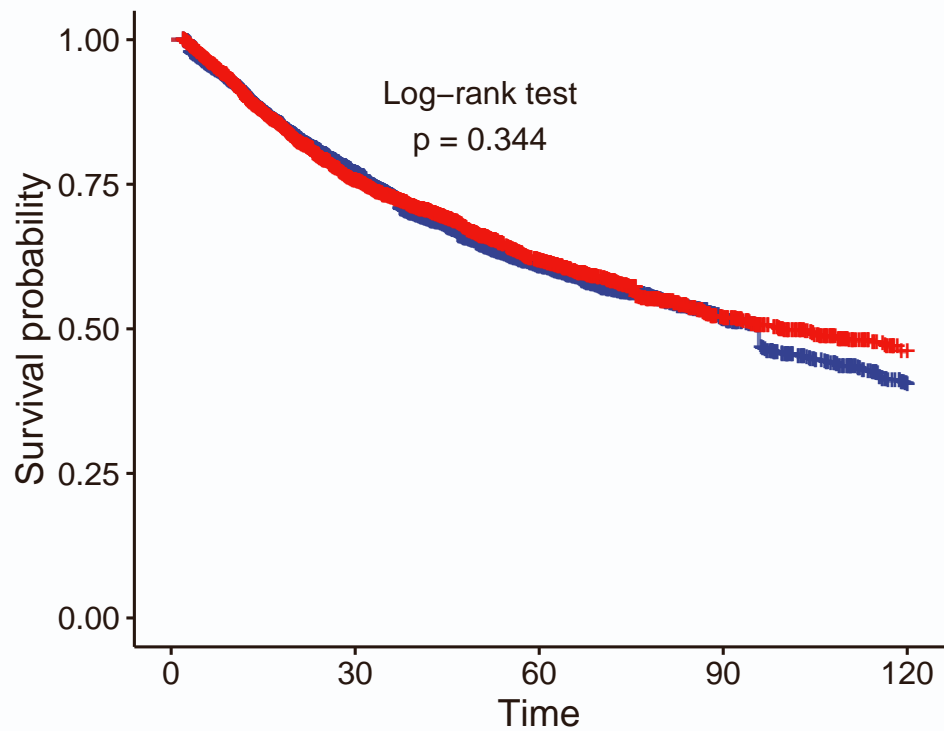

### Overall survival

| Feature27 | 0    | 30   | 60   | 90  | 120 |
|-----------|------|------|------|-----|-----|
| C1        | 6091 | 2704 | 1112 | 532 | 255 |
| C2        | 4178 | 1907 | 847  | 362 | 167 |

Time

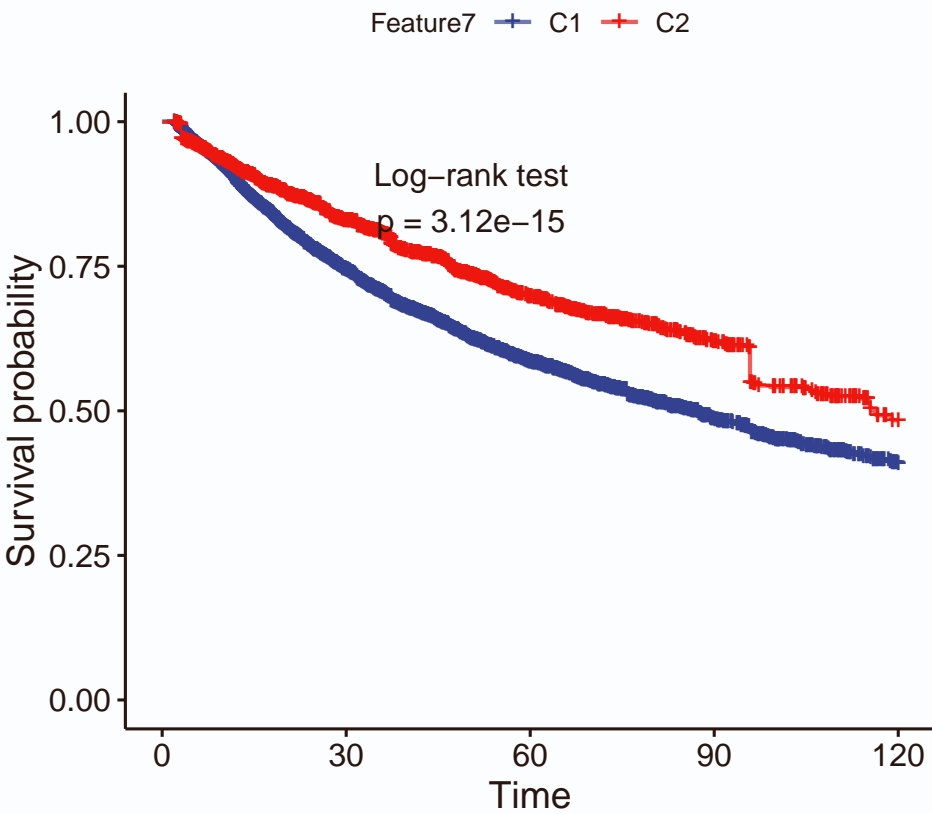

Overall survival

| Feature7 | 0    | 30   | 60   | 90  | 120 |
|----------|------|------|------|-----|-----|
| C1       | 8000 | 3417 | 1411 | 628 | 311 |
| C2       | 2269 | 1194 | 548  | 266 | 111 |

Time

Feature10 + C1 + C2

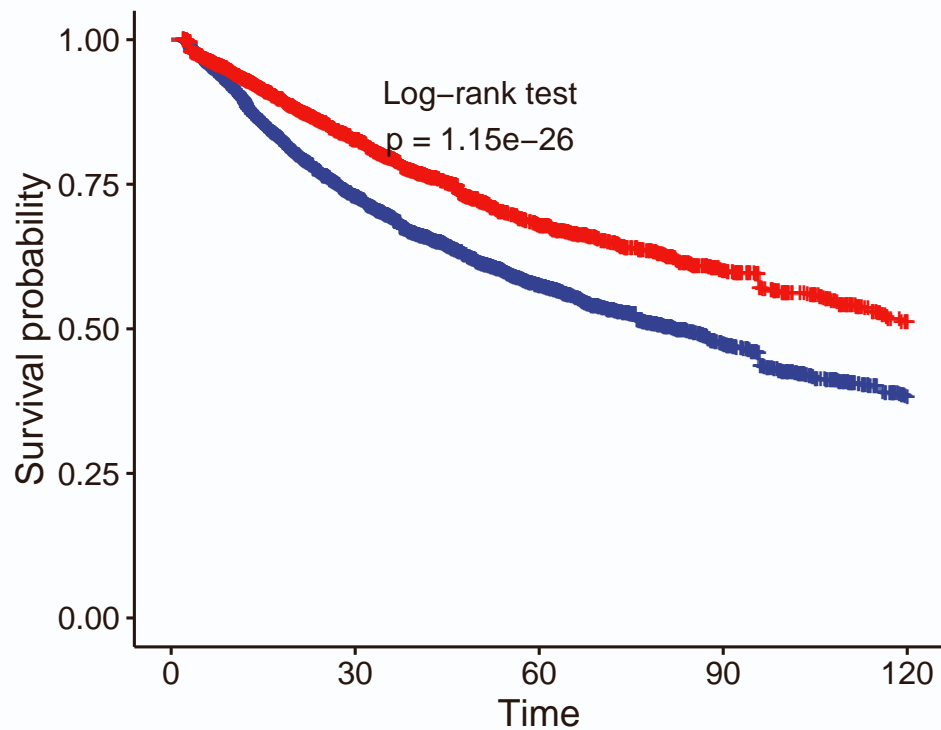

### Overall survival

| Feature10 | 0    | 30   | 60   | 90  | 120 |
|-----------|------|------|------|-----|-----|
| C1        | 6482 | 2778 | 1202 | 557 | 261 |
| C2        | 3787 | 1833 | 757  | 337 | 161 |

Time

Feature12 + C1 + C2

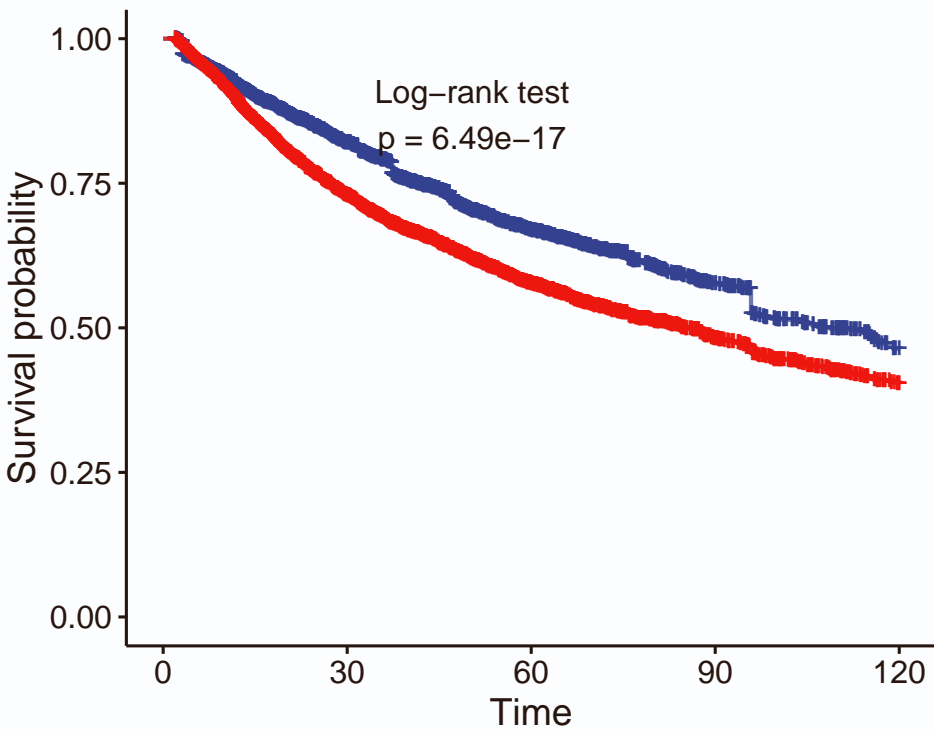

### Overall survival

| Feature12 | 0    | 30   | 60   | 90  | 120 |
|-----------|------|------|------|-----|-----|
| C1        | 3835 | 1922 | 832  | 363 | 158 |
| C2        | 6434 | 2689 | 1127 | 531 | 264 |

Feature20 + C1 + C2

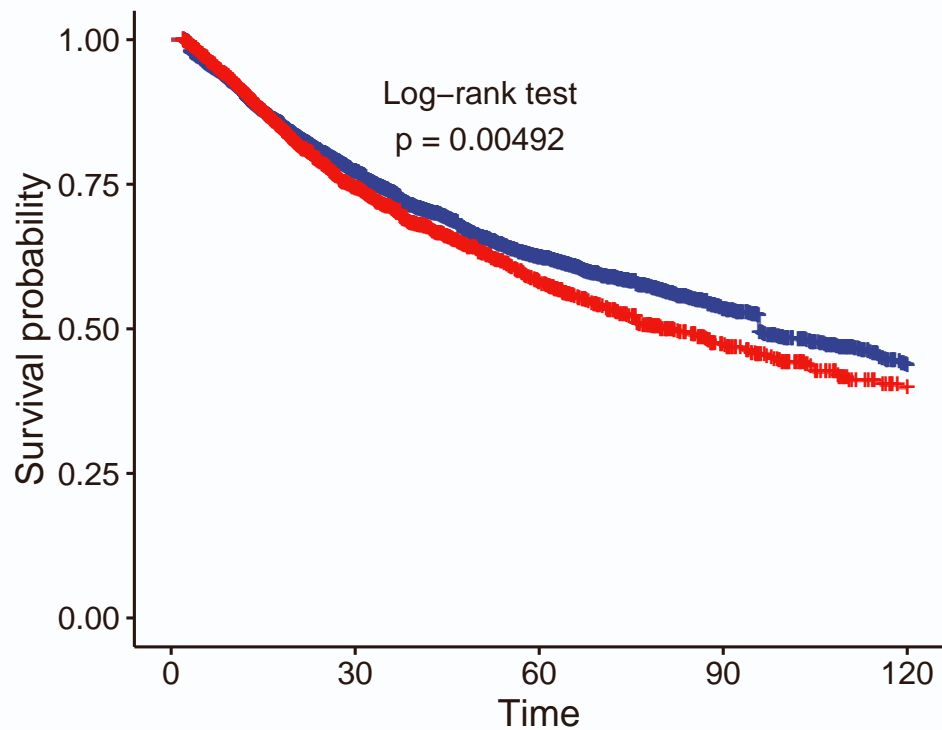

### Overall survival

| Feature20 | 0    | 30   | 60   | 90  | 120 |
|-----------|------|------|------|-----|-----|
| C1        | 7446 | 3416 | 1470 | 691 | 331 |
| C2        | 2823 | 1195 | 489  | 203 | 91  |



Feature21 + C1 + C2

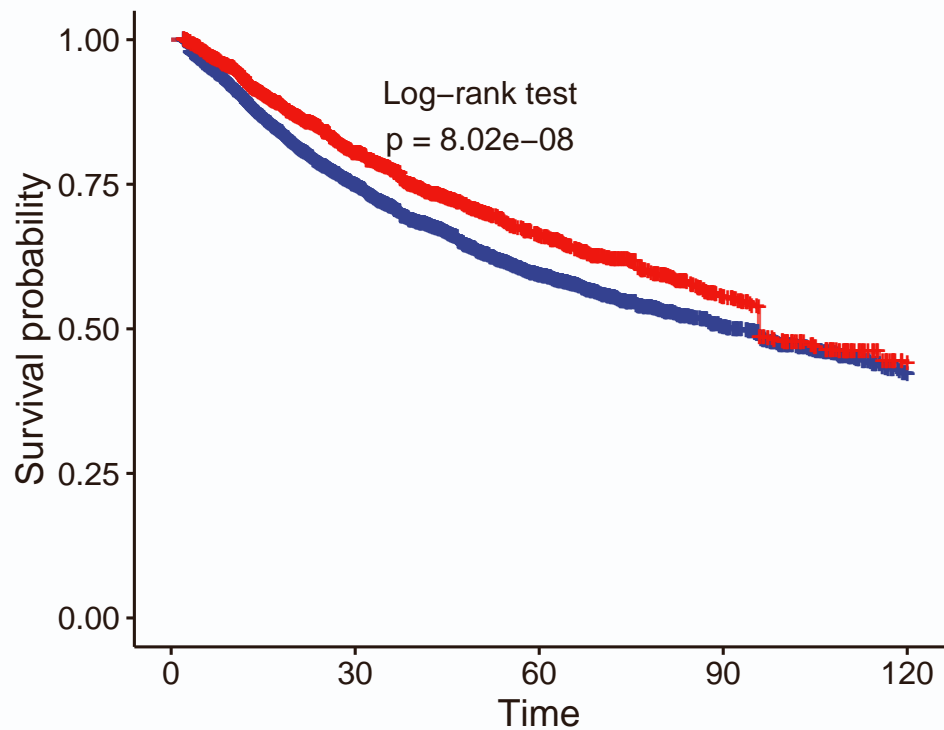

### Overall survival

| Feature21 | 0    | 30   | 60   | 90  | 120 |
|-----------|------|------|------|-----|-----|
| C1        | 7358 | 3200 | 1299 | 616 | 302 |
| C2        | 2911 | 1411 | 660  | 278 | 120 |

Time

Feature4 + C1 + C2

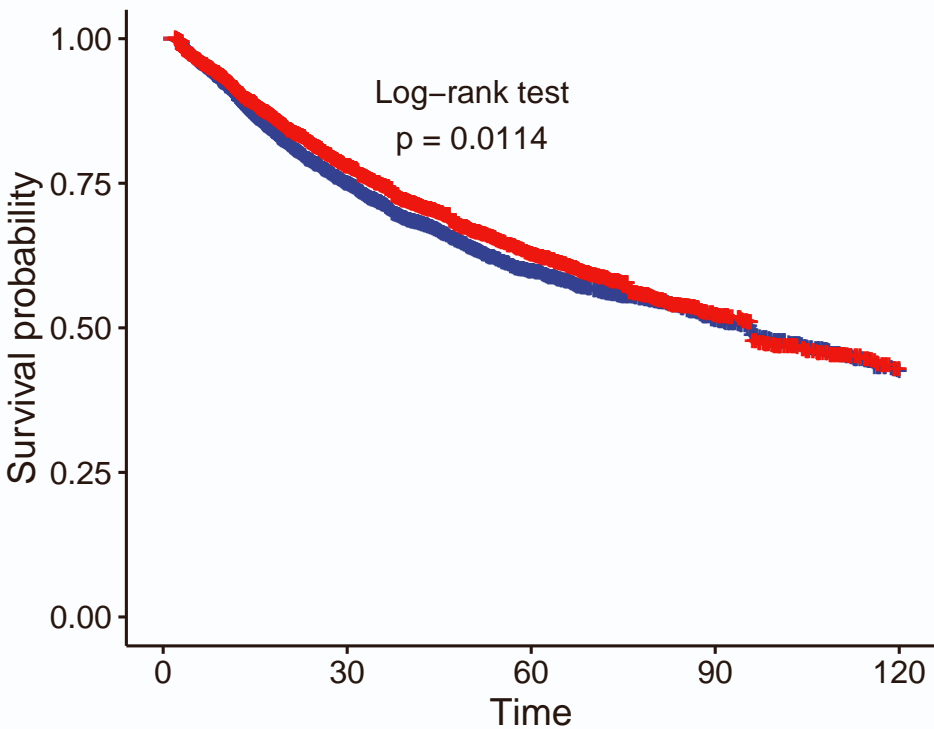

### Overall survival

| Feature4 | 0    | 30   | 60   | 90  | 120 |
|----------|------|------|------|-----|-----|
| C1       | 5218 | 2270 | 951  | 456 | 226 |
| C2       | 5051 | 2341 | 1008 | 438 | 196 |

Time

Feature26 + C1 + C2

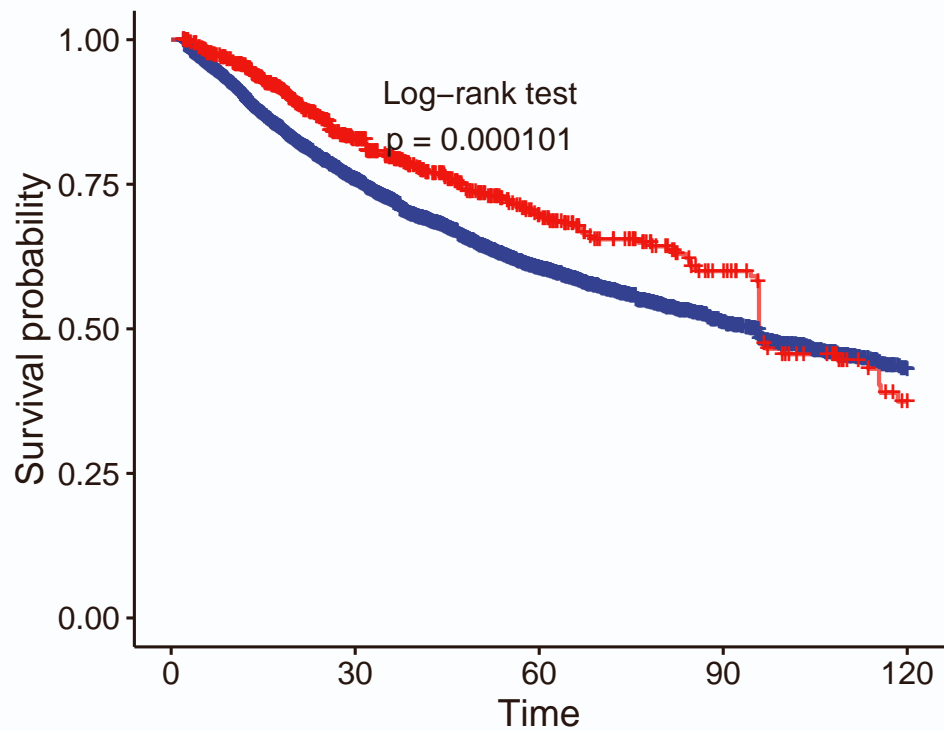

### Overall survival

| Feature26 | 0    | 30   | 60   | 90  | 120 |
|-----------|------|------|------|-----|-----|
| C1        | 9417 | 4224 | 1806 | 820 | 398 |
| C2        | 852  | 387  | 153  | 74  | 24  |

Time

Feature1 + C1 + C2

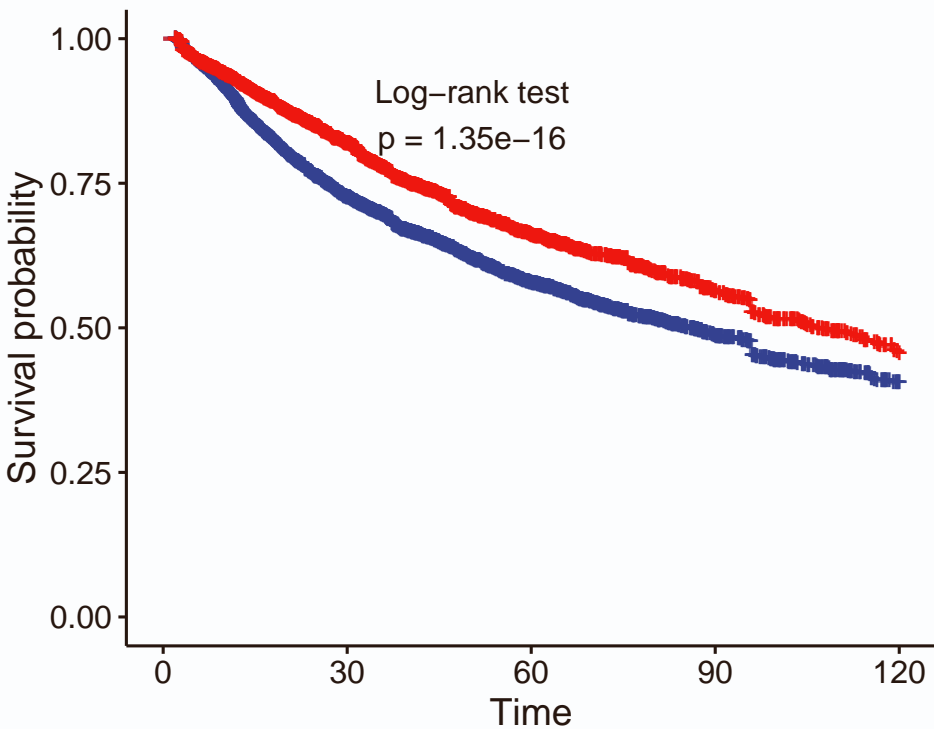

### Overall survival

| Feature1 | 0    | 30   | 60   | 90  | 120 |
|----------|------|------|------|-----|-----|
| C1       | 6017 | 2562 | 1123 | 522 | 246 |
| C2       | 4252 | 2049 | 836  | 372 | 176 |

Time

Feature3 + C1 + C2

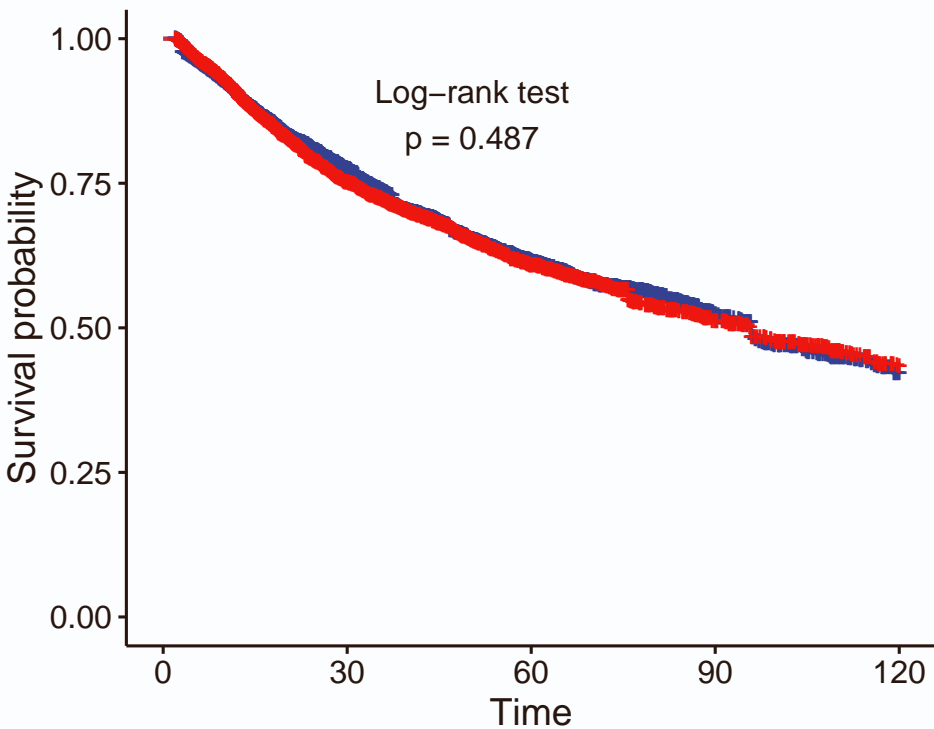

### Overall survival

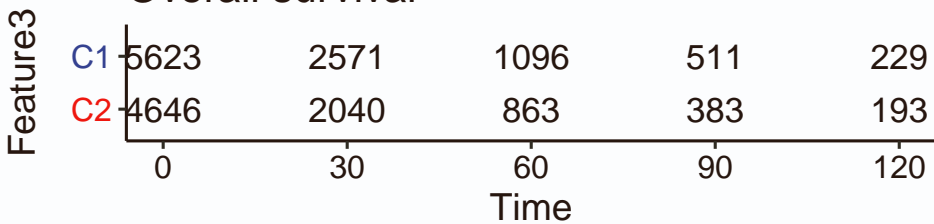

Feature9 + C1 + C2

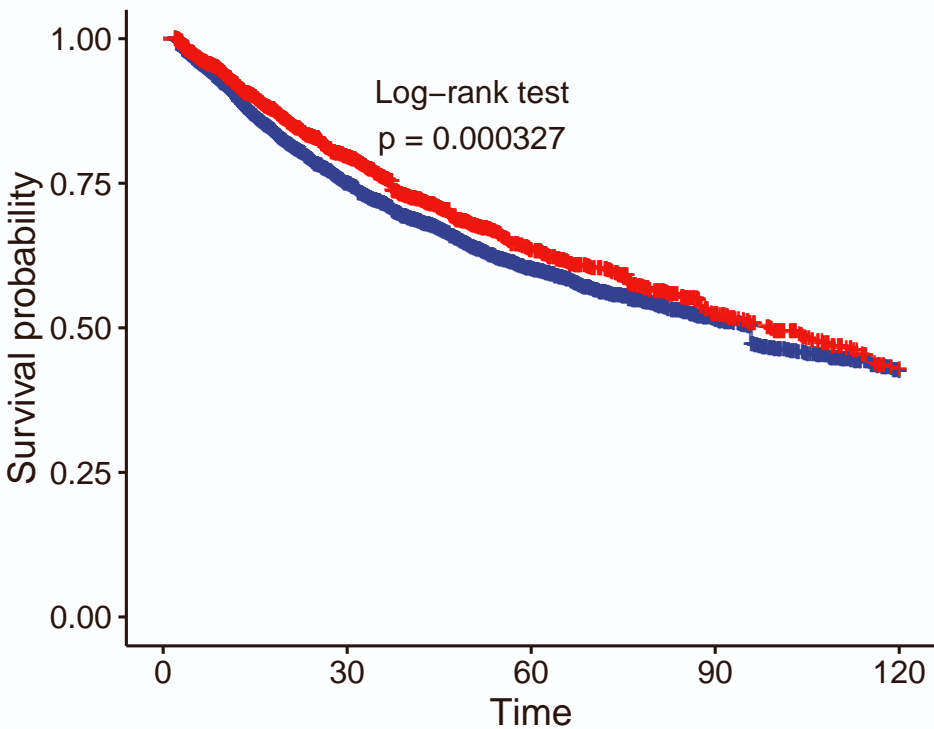

### Overall survival

| Feature9 | 0    | 30   | 60   | 90  | 120 |
|----------|------|------|------|-----|-----|
| C1       | 6933 | 3091 | 1359 | 634 | 300 |
| C2       | 3336 | 1520 | 600  | 260 | 122 |

Time

Feature28 + C1 + C2

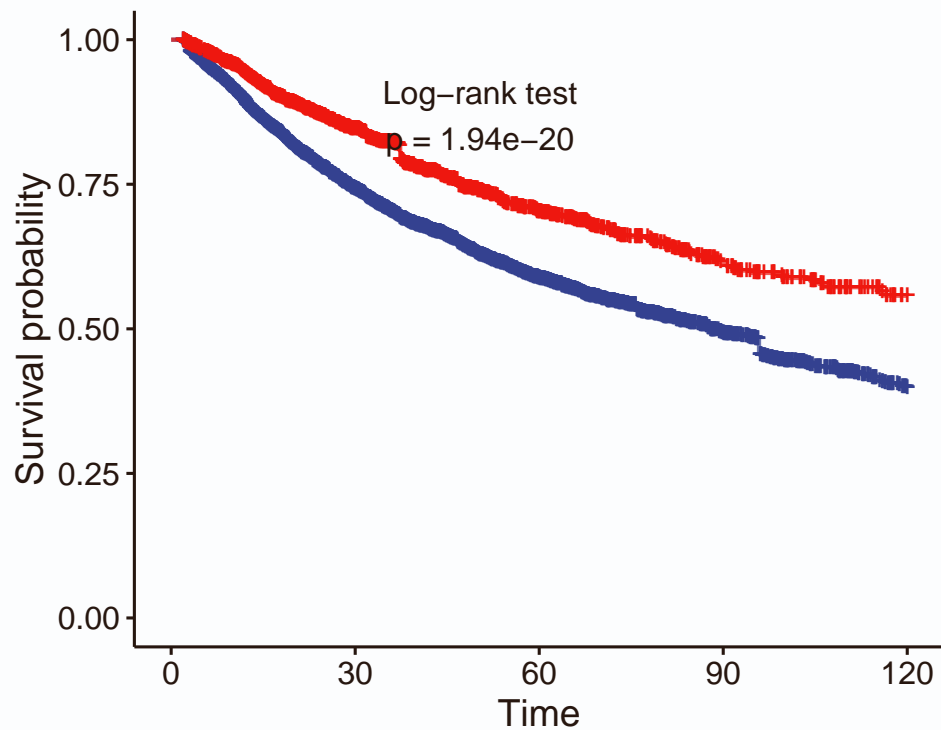

### Overall survival

| Feature28 | 0    | 30   | 60   | 90  | 120 |
|-----------|------|------|------|-----|-----|
| C1        | 8122 | 3586 | 1524 | 723 | 357 |
| C2        | 2147 | 1025 | 435  | 171 | 65  |

Time

Feature49 + C1 + C2

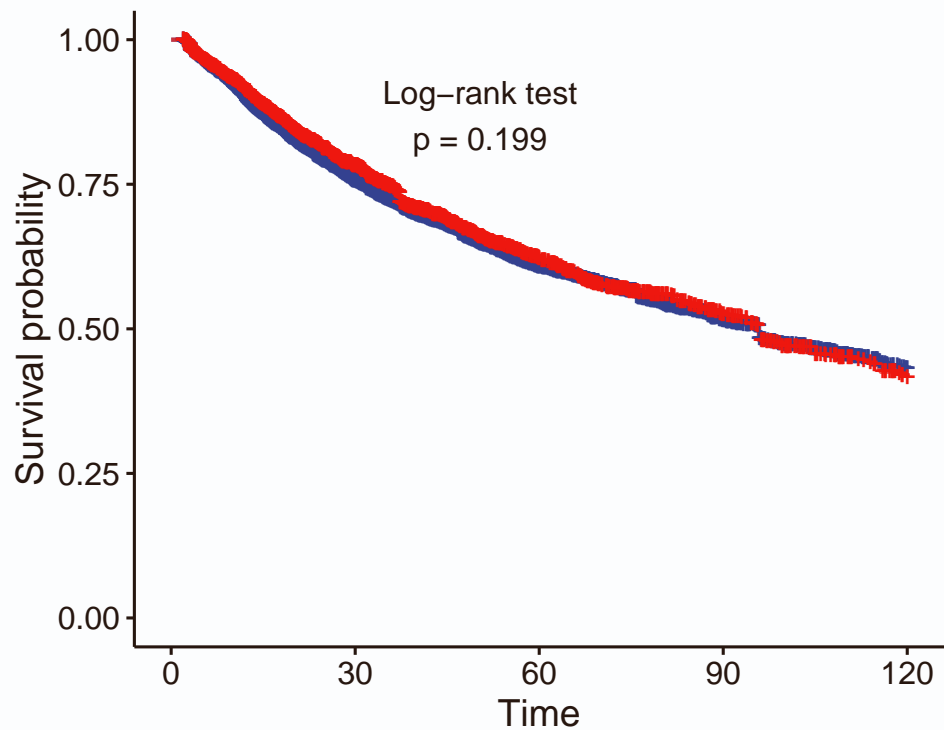

### Overall survival

| Feature49 | 0    | 30   | 60   | 90  | 120 |
|-----------|------|------|------|-----|-----|
| C1        | 7218 | 3220 | 1387 | 622 | 300 |
| C2        | 3051 | 1391 | 572  | 272 | 122 |

Time



Feature29 + C1 + C2

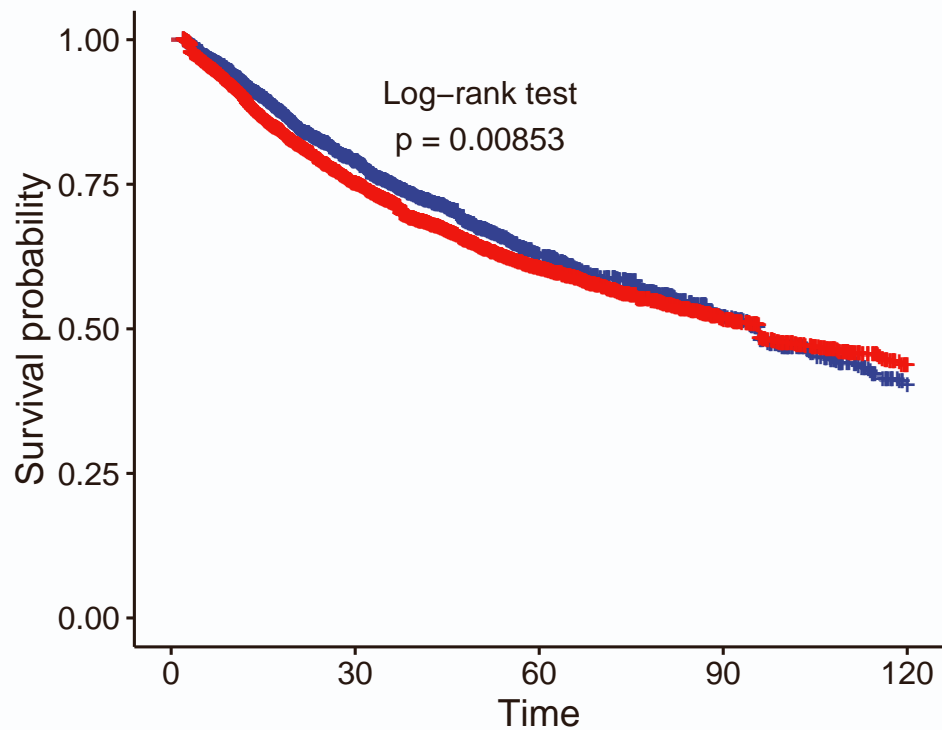

### Overall survival

| Feature29 | 0    | 30   | 60   | 90  | 120 |
|-----------|------|------|------|-----|-----|
| C1        | 3519 | 1593 | 644  | 293 | 123 |
| C2        | 6750 | 3018 | 1315 | 601 | 299 |

Time
